# Supplementary material for: Gold nanoparticles functionalized poly(3,4-ethylenedioxythiophene) thin film for highly sensitive label free DNA detection
Source: Royal Society of Chemistry journal article supplement (doi:10.1039/c2ay26143j), 2012-11-19
Supplement: c2ay26143j.pdf [file c2ay26143j.pdf]

## Supplementary Figures

### Gold nanoparticles functionalized poly(3,4-ethylenedioxythiophene) thin film for high sensitive label free DNA detection

S. Radhakrishnan, C.Sumathi , V. Dharuman, J. Wilson

*Polymer Electronics Lab*

*Department of Bioelectronics and Biosensors, Alagappa University,  
Karaikudi-6300 003, Tamilnadu*

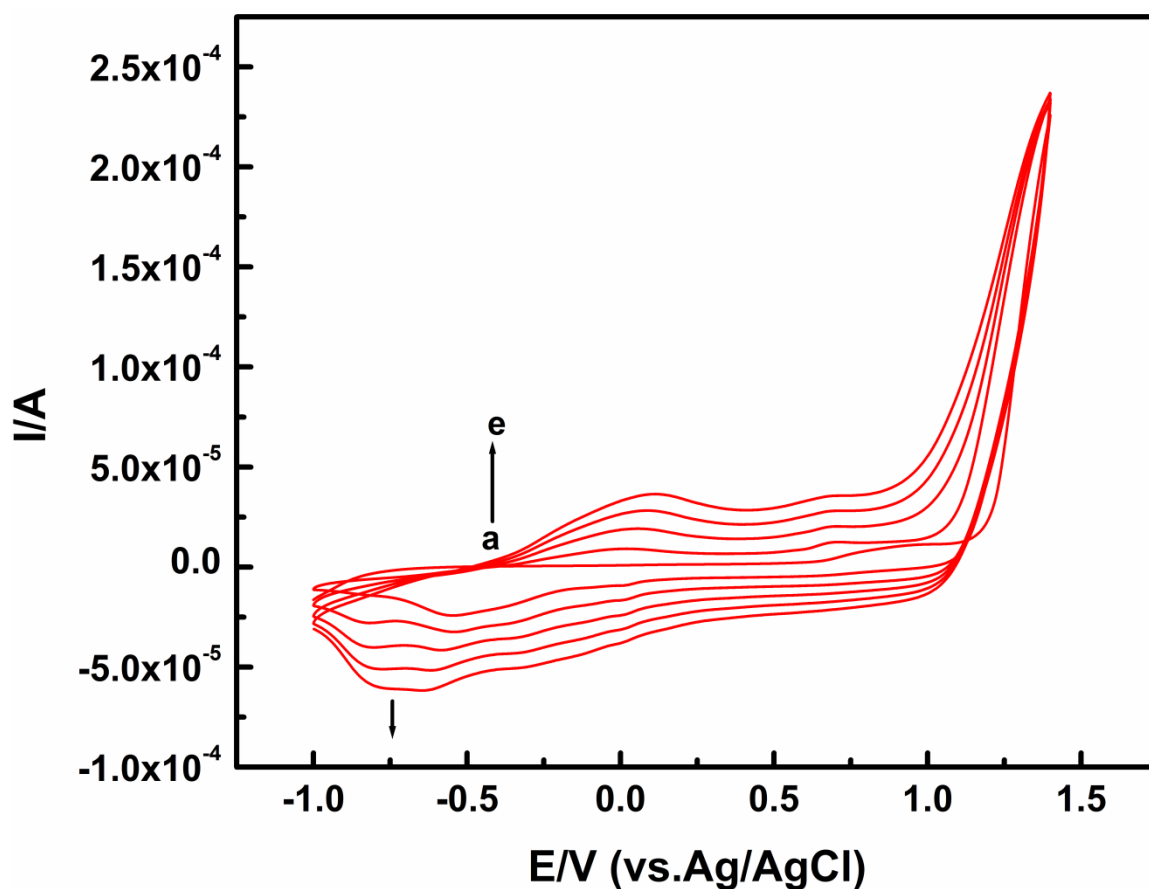

Fig. S1

**Fig. S1.** Polymerization of PEDOT (5 cycles) on GC electrode in 10 mM EDOT and propylene carbonate containing 0.1 M LiClO<sub>4</sub> at scan rate of 100 mV/s. (a) 1<sup>st</sup> and (e) 5<sup>th</sup> cycles.

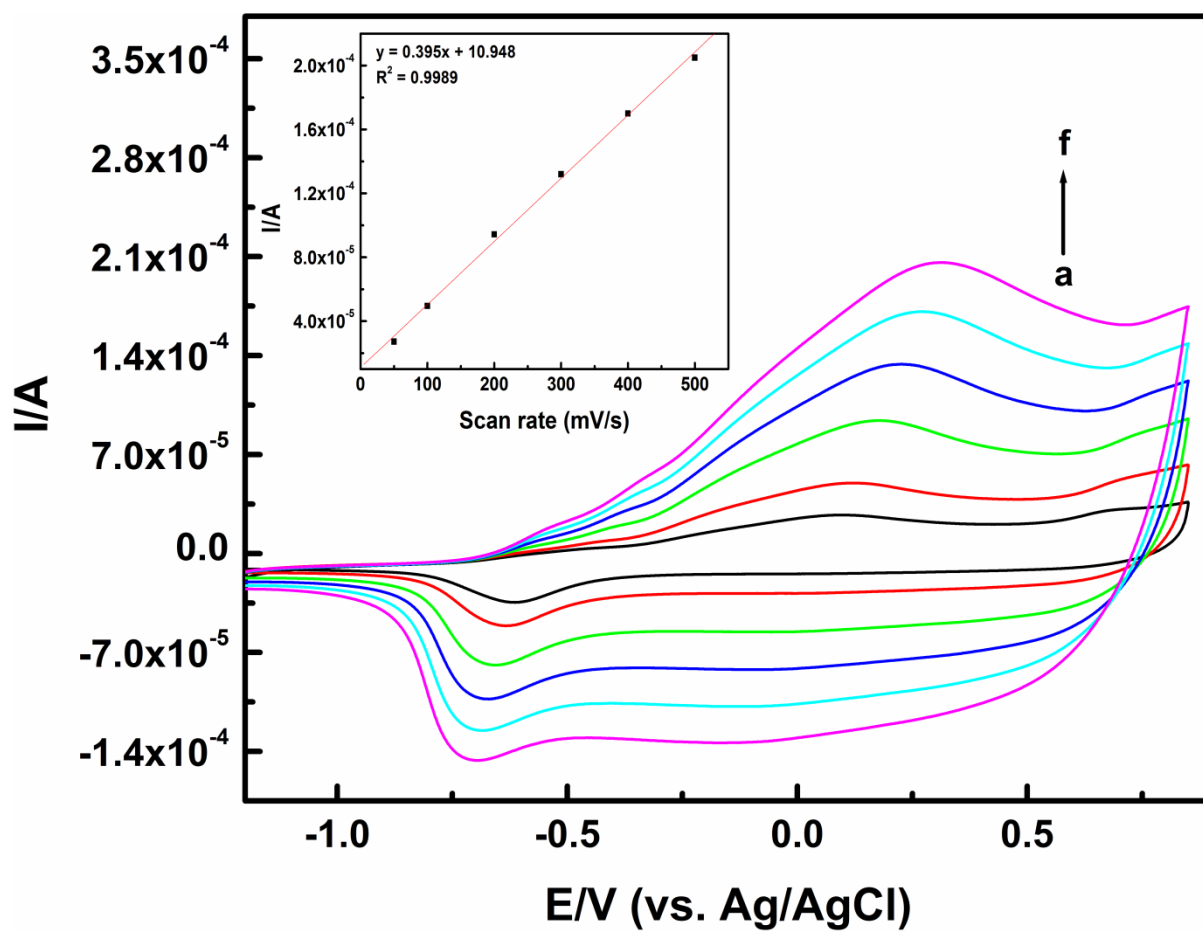

Fig. S2

**Fig. S2.** CVs of PEDOT on a GC electrode deposited by 5 cycles in propylene carbonate at a scan rate of (a)  $10 \text{ mVs}^{-1}$ , (b)  $100 \text{ mVs}^{-1}$ , (c)  $200 \text{ mVs}^{-1}$ , (d)  $300 \text{ mVs}^{-1}$ , (e)  $400 \text{ mVs}^{-1}$  and (f)  $500 \text{ mVs}^{-1}$ . Inset: plot of the anodic peak currents vs. scan rate.

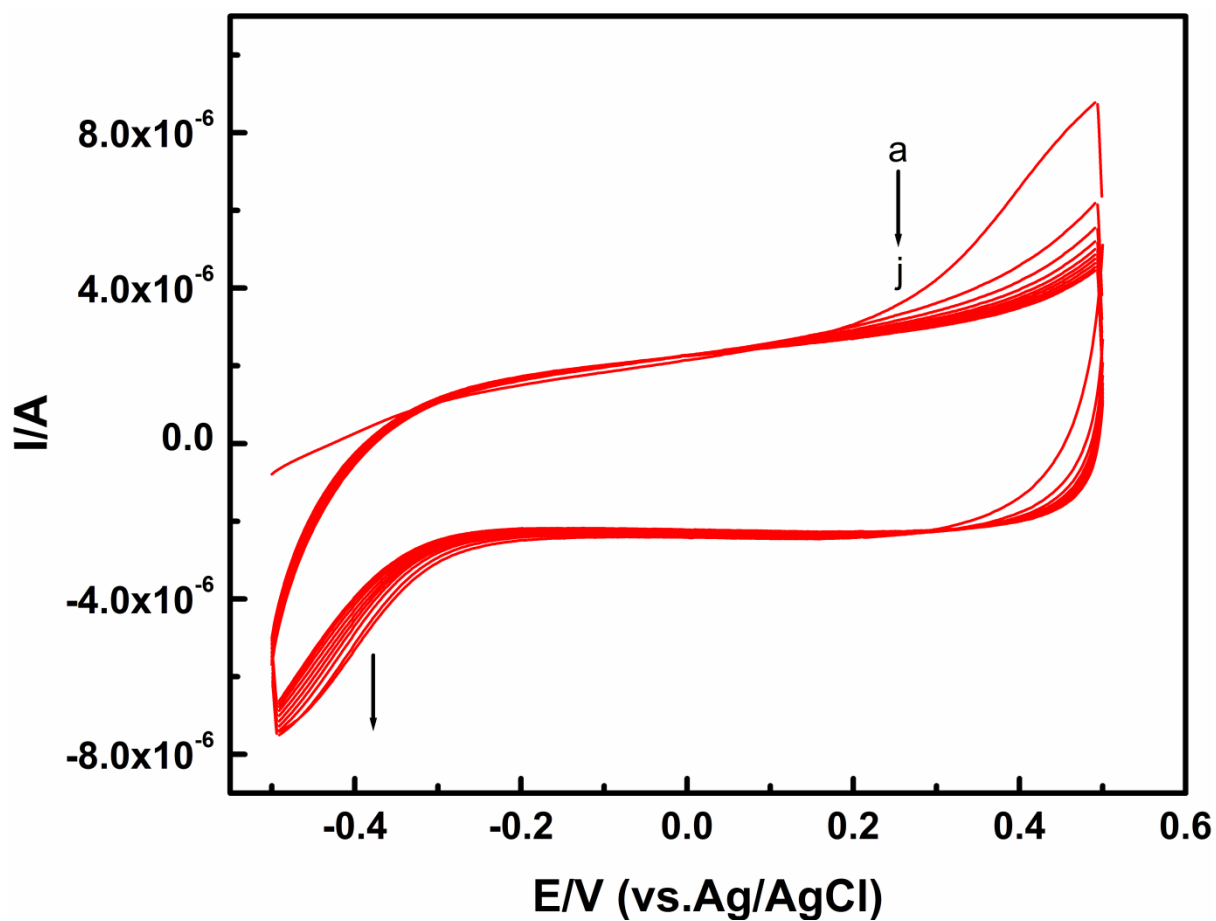

Fig. S3

**Fig. S3** CV of PEDOT film in 0.1 M Tris-HCl (pH 7.0) in the potential between -0.5 to 0.5 V for continuous 10 cycles at a scan rate of 50 mV/s.

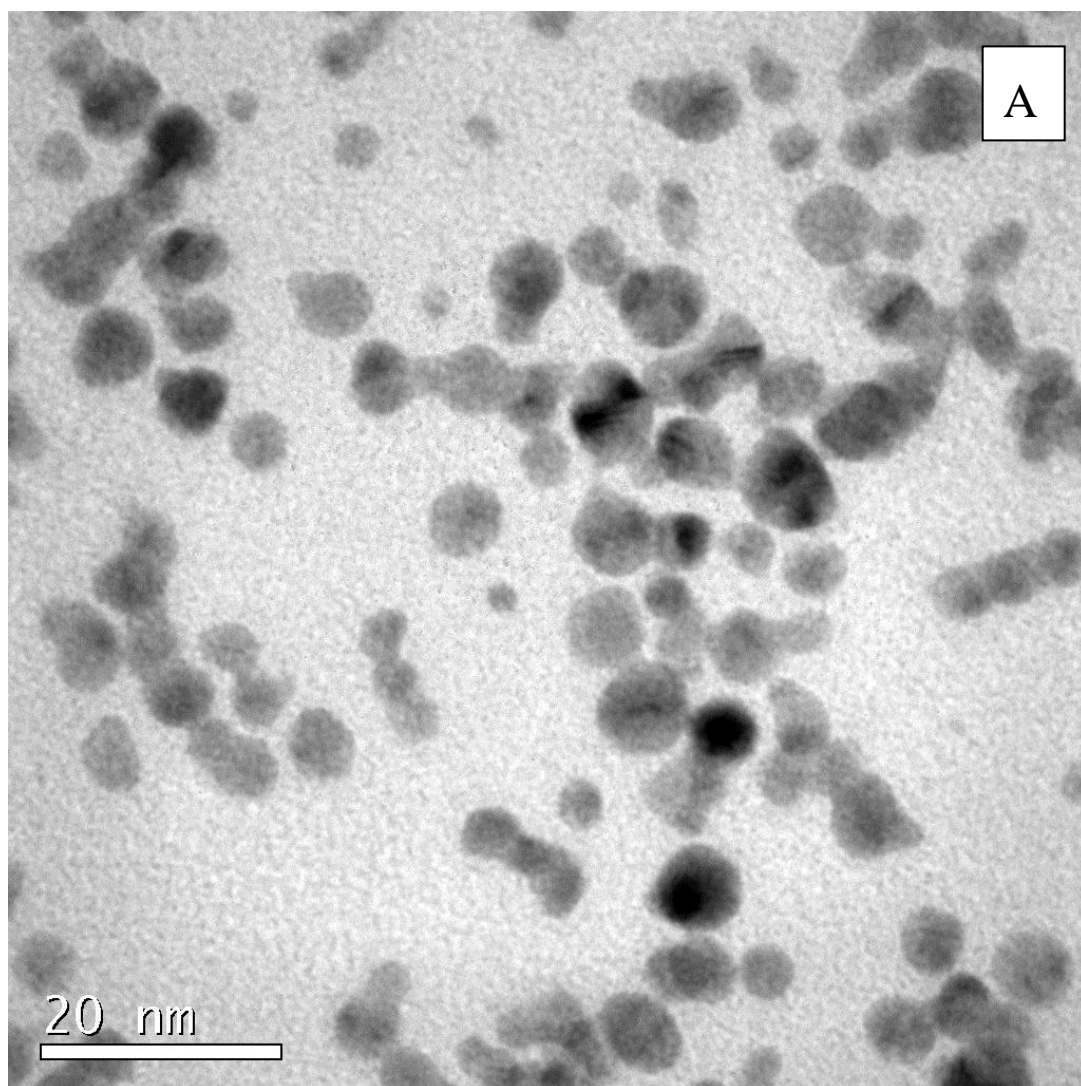

**Fig. S (4A)**

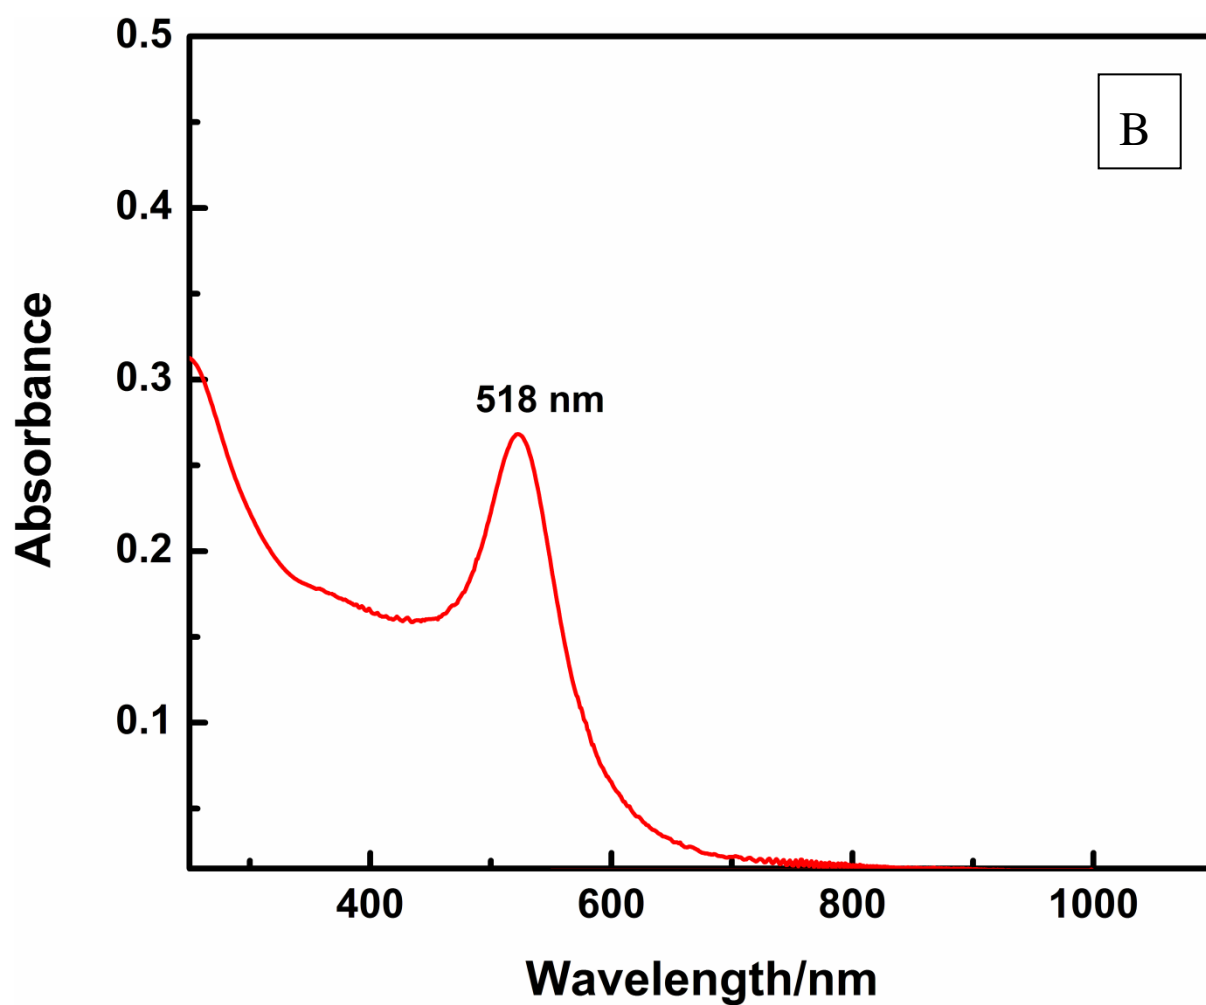

Fig. S4B

Fig. S4 (A) TEM image of AuNPs; (B) UV-Vis spectrum of corresponding AuNP

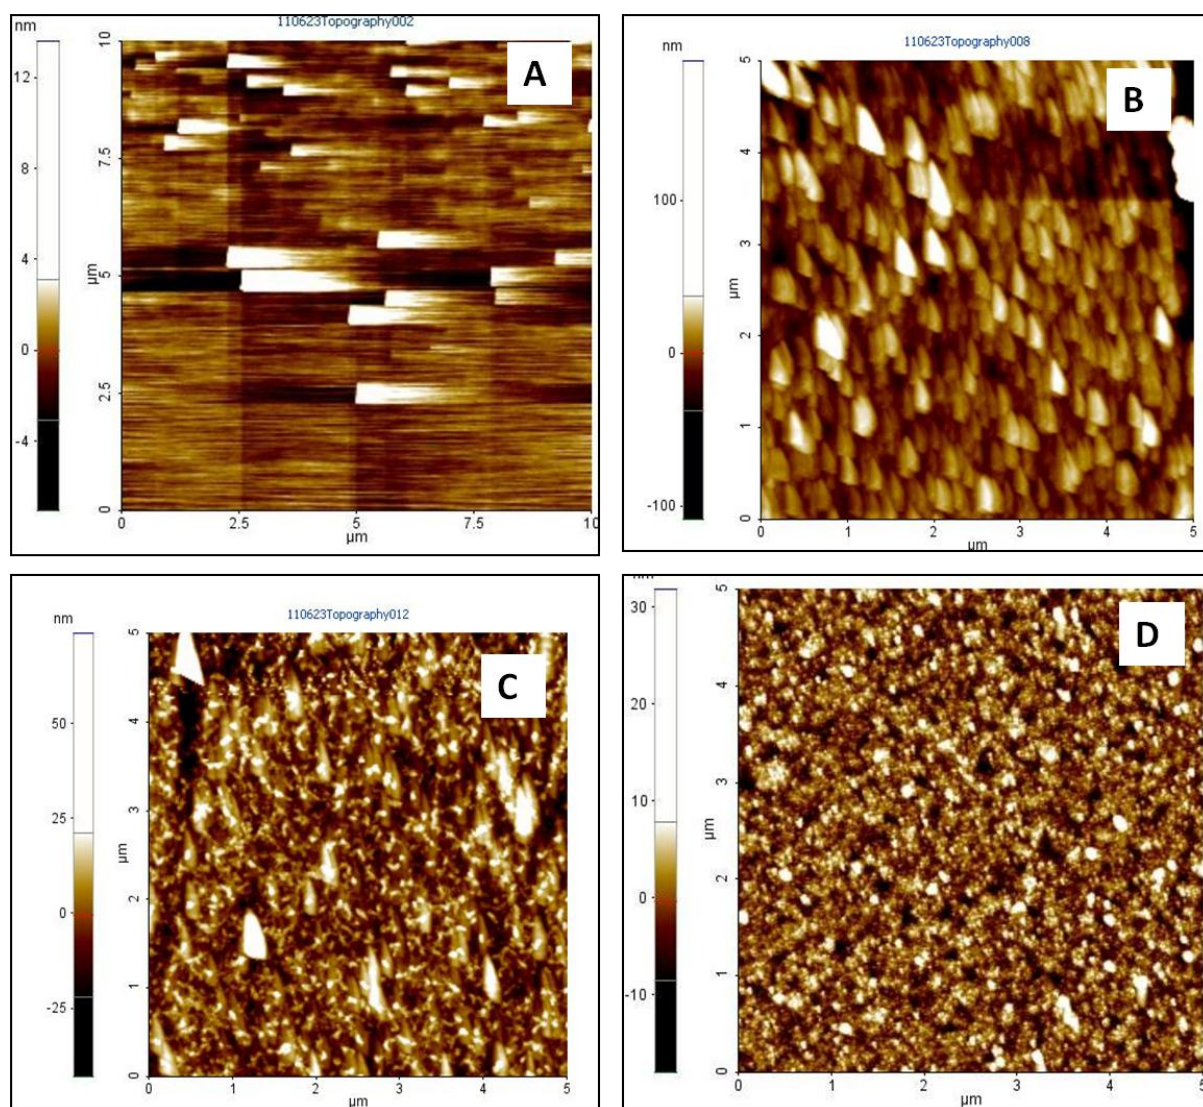

**Fig. S5**

**Fig. S5** AFM images of (A) bare Au; (B) PEDOT; (C) PEDOT- AuNPs and (D) PEDOT- AuNPs-S-ssDNA on individual gold coated silicon chips.

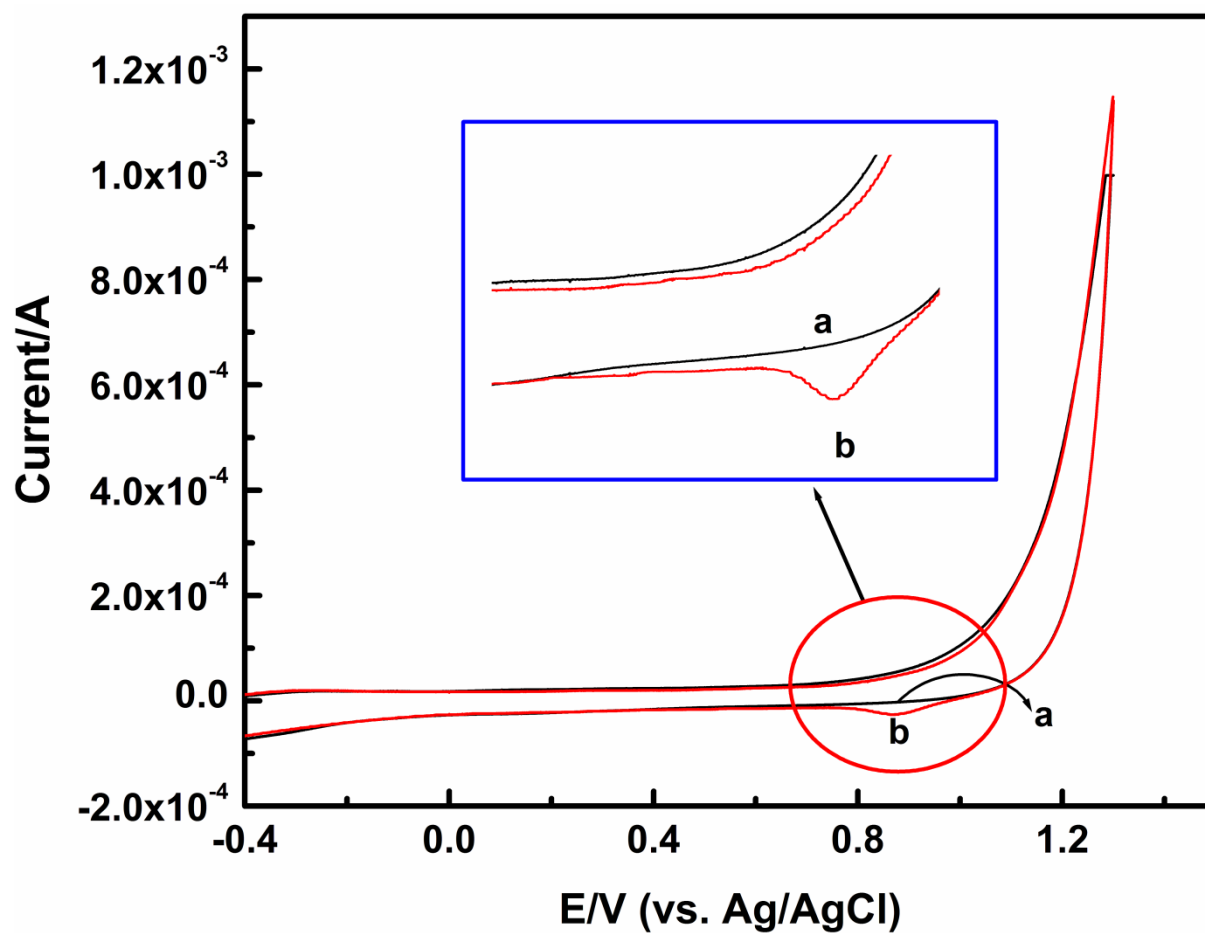

Fig. S6

**Fig. S6** CV of (a) PEDOT and (b) PEDOT-AuNPs modified electrode in 0.5 M  $\text{H}_2\text{SO}_4$  in the potential range between -0.4 to 1.3 V at a scan rate of 100 mV/s.

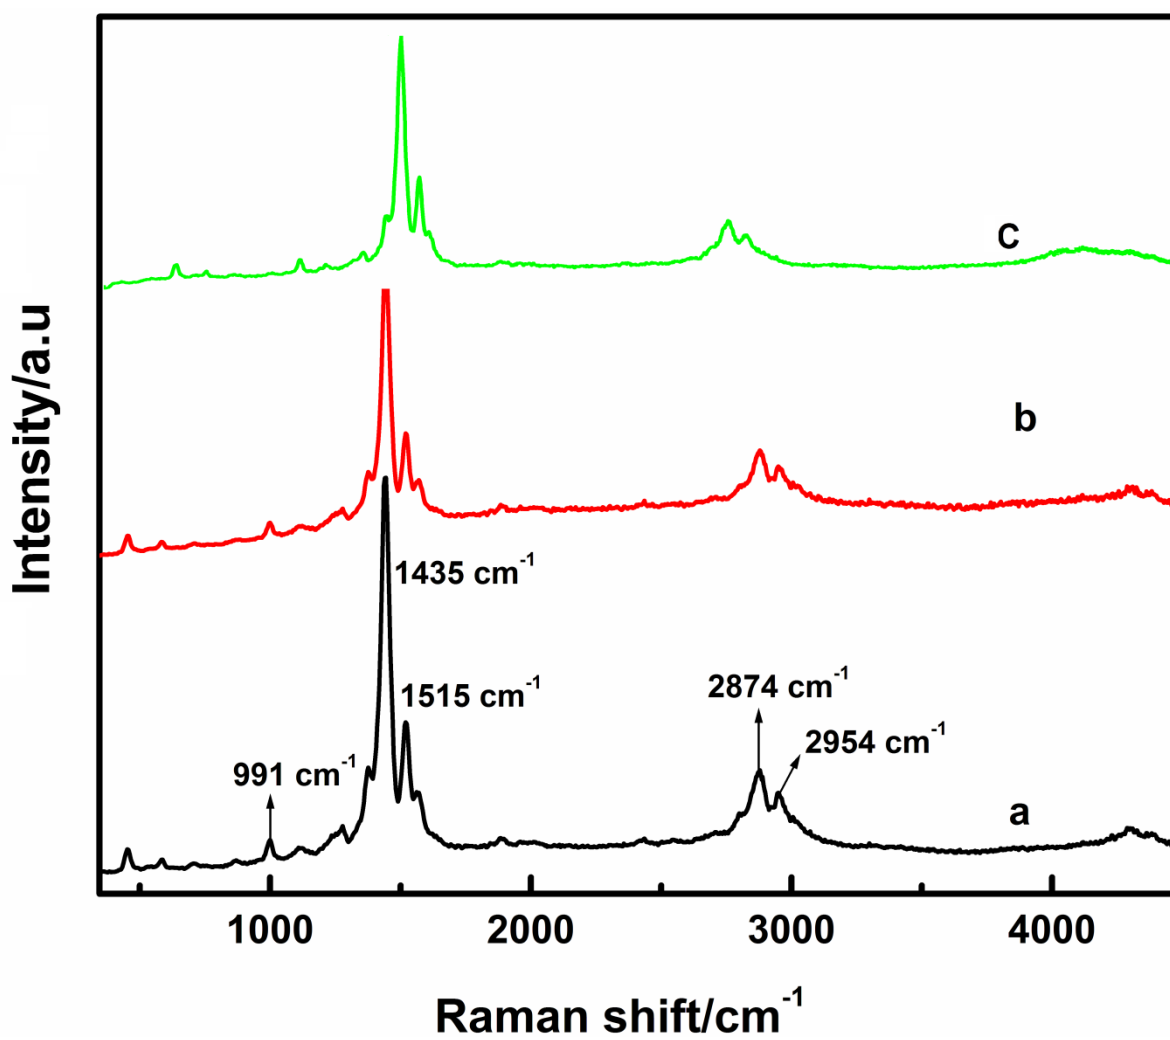

**Fig. S7**

**Fig. S7** Surface laser Raman spectra of (a) PEDOT, (b) PEDOT- AuNP and (c) PEDOT- Au NPs -S-ssDNA on gold coated silicon chip.



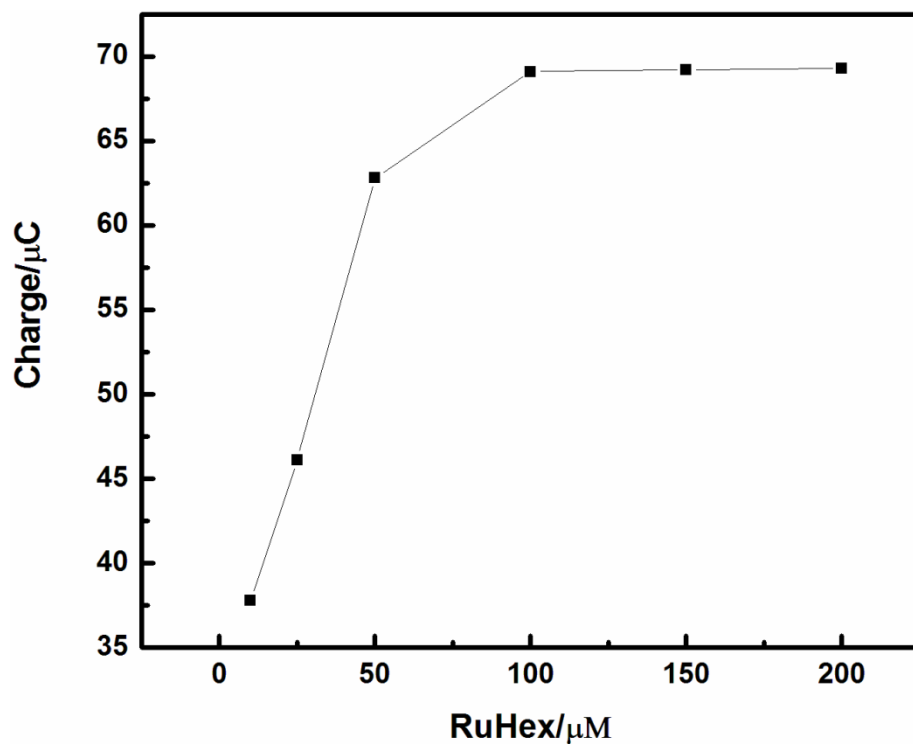

**Fig. S8.** Effect of RuHex concentration (10-200 μM) on CC signal of RuHex at complementary dsDNA modified electrode surface.
